# Supplementary material for: ZipA Uses a Two-Pronged FtsZ-Binding Mechanism Necessary for Cell Division
Source: PubMed Central journal article supplement (PMC8669495; doi:10.1128/mbio.02529-21), 2021-12-14
Supplement: mbio.02529-21-sf003.pdf [file mbio.02529-21-sf003.pdf]

| 10     | 20     | 30    | 40    | 50    |       |        |       |       |       |     |           |      |        |
|--------|--------|-------|-------|-------|-------|--------|-------|-------|-------|-----|-----------|------|--------|
| MMQDLR | LILI   | IVGAI | AIAL  | LVHGF | WTSRK | ERSSM  | FRDRP | LKR   | MKSKR | DD  |           |      |        |
| 60     | 70     | 80    | 90    | 100   | 110   | 120    | 130   | 140   | 150   | 160 |           |      |        |
| DSYDED | VEDD   | EGVGE | VRVHR | VNHAP | ANAQE | HEAAR  | PSPQH | QYQPP | YASAQ |     |           |      |        |
| 160    | 170    | 180   | 190   | 200   | 210   | 220    | 230   | 240   | 250   | 260 |           |      |        |
| PRQPV  | QQPPE  | AQVPP | QHAPH | PAQPV | QQPAY | QPQPE  | QPLQQ | PVSPQ | VAPAP |     |           |      |        |
| 260    | 270    | 280   | 290   | 300   | 310   | 320    |       |       |       |     |           |      |        |
| QPVHS  | SAPQA  | QQA   | FQPA  | EAEPV | AAQPE | PEPVAE | PAPVM | DKPKR | KEA   | VI  | IMNVA     |      |        |
| AHHG   | SELNGE | LLLNS | IQQAG | FIFGD | MNI   | YH     | RHLSP | DGSGP | ALFSL | AN  | MVK       |      |        |
| PGTFD  | PEMKD  | FTTPG | V     | T     | I     | F      | M     | QVPSY | GDELQ | N   | FKLMLQSAQ | HIAD | EVGGVV |
| LDDQ   | R      | MMTP  | QKL   | REY   | QDII  | REV    | KDANA |       |       |     |           |      |        |

Highlighted are positions of M44V, L211T, Y229C, N281S (*zipA1* mutations). Note that Y229 is adjacent to a strong FtsZ contacting residue (I228)

Highlighted are residues in contact with FtsZ

Highlighted are residues that form strong crosslinking species containing FtsZ

TM is in orange
