# Supplementary material for: ZipA Uses a Two-Pronged FtsZ-Binding Mechanism Necessary for Cell Division
Source: PubMed Central journal article supplement (PMC8669495; doi:10.1128/mbio.02529-21), 2021-12-14

Miller Units

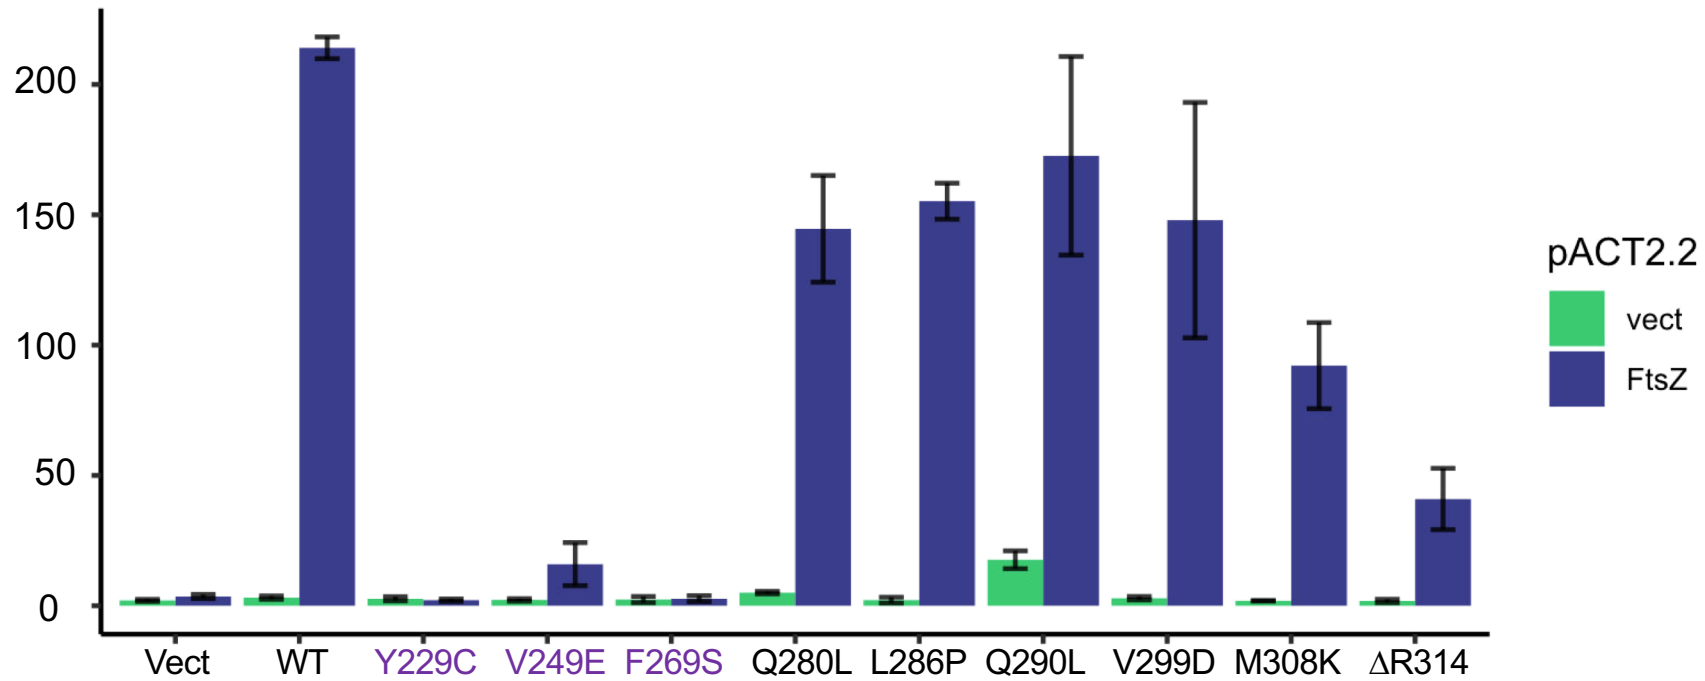

Supplement: mbio.02529-21-sf004.pdf [file mbio.02529-21-sf004.pdf]
