# Supplementary material for: ZipA Uses a Two-Pronged FtsZ-Binding Mechanism Necessary for Cell Division
Source: PubMed Central journal article supplement (PMC8669495; doi:10.1128/mbio.02529-21), 2021-12-14

0  $\mu$ M IPTG25  $\mu$ M IPTG100  $\mu$ M IPTG

ND -1 -2 -3 -4 -5

ND -1 -2 -3 -4 -5

ND -1 -2 -3 -4 -5

30°C

vector

WT

V249E

 $\Delta$ 314V249E  $\Delta$ 314

37°C

vector

WT

V249E

 $\Delta$ 314V249E  $\Delta$ 314

42°C

vector

WT

V249E

 $\Delta$ 314V249E  $\Delta$ 314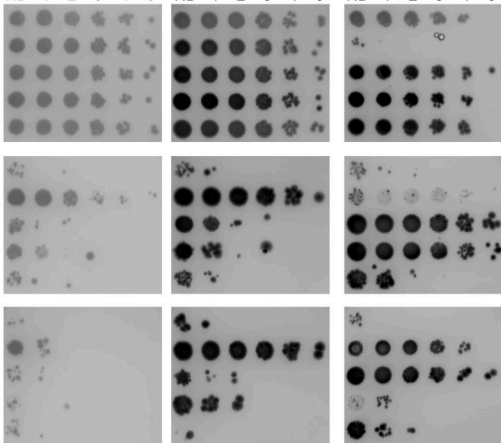

Supplement: mbio.02529-21-sf005.pdf [file mbio.02529-21-sf005.pdf]
