# Supplementary material for: ZipA Uses a Two-Pronged FtsZ-Binding Mechanism Necessary for Cell Division
Source: PubMed Central journal article supplement (PMC8669495; doi:10.1128/mbio.02529-21), 2021-12-14
Supplement: mbio.02529-21-sf006.pdf [file mbio.02529-21-sf006.pdf]

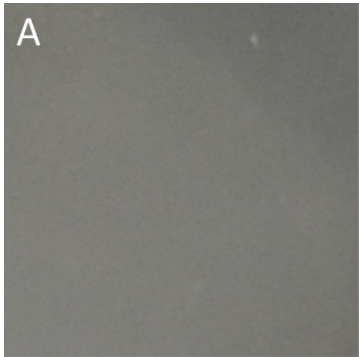

*ΔzipA::kan* transduced into  
pDSW210-*zipA(F269S)*-GFP

0.5 mM IPTG

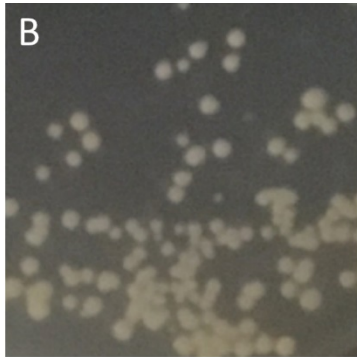

*ΔzipA::kan* transduced into  
pDSW210-*zipA(F269S,Q280L)*-GFP

0.5 mM IPTG

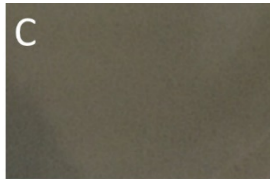

0 mM IPTG

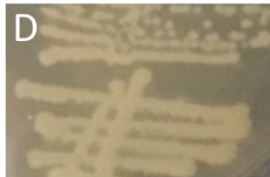

0.5 mM IPTG

*ΔzipA::kan* transduced into  
pDSW210-*zipA(F269S,Q280L)*-GFP  
*isolated transductant*
